# Supplementary material for: A Silicon-Based PDMS-PEG Copolymer Microfluidic Chip for Real-Time Polymerase Chain Reaction Diagnosis
Source: MDPI journal article supplement (doi:10.3390/jfb14040208), 2023-04-09
Supplement: s1 [file s1]

# A Silicon Based PDMS-PEG Copolymer Microfluidic Chip for Real-time Polymerase Chain Reaction Diagnosis

## Supplementary Materials

**Table S1.** Sequences of primers and probes used in this study to test the PPc-Si chips.

| Primers and probes | Sequences (5' to 3')              |
|--------------------|-----------------------------------|
| C-HBV2 Pb478       | 6-FAM-ACTCCCTCGCCTCGCAGACGA-BHQ-1 |
| C-HBV2 F382        | ACTCCTCCAGCTTATAGACCACCA          |
| C-HBV2 R518        | CGACGCGGCGATTGAGA                 |

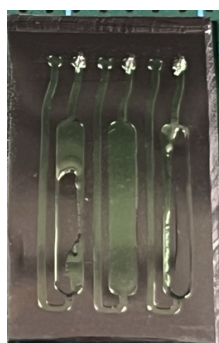

**Figure S1.** Collapsed microfluidic chips after being pressed at 0.5 MPa. The inner surface of the reaction channel was incorrectly bonded with the silicon base.

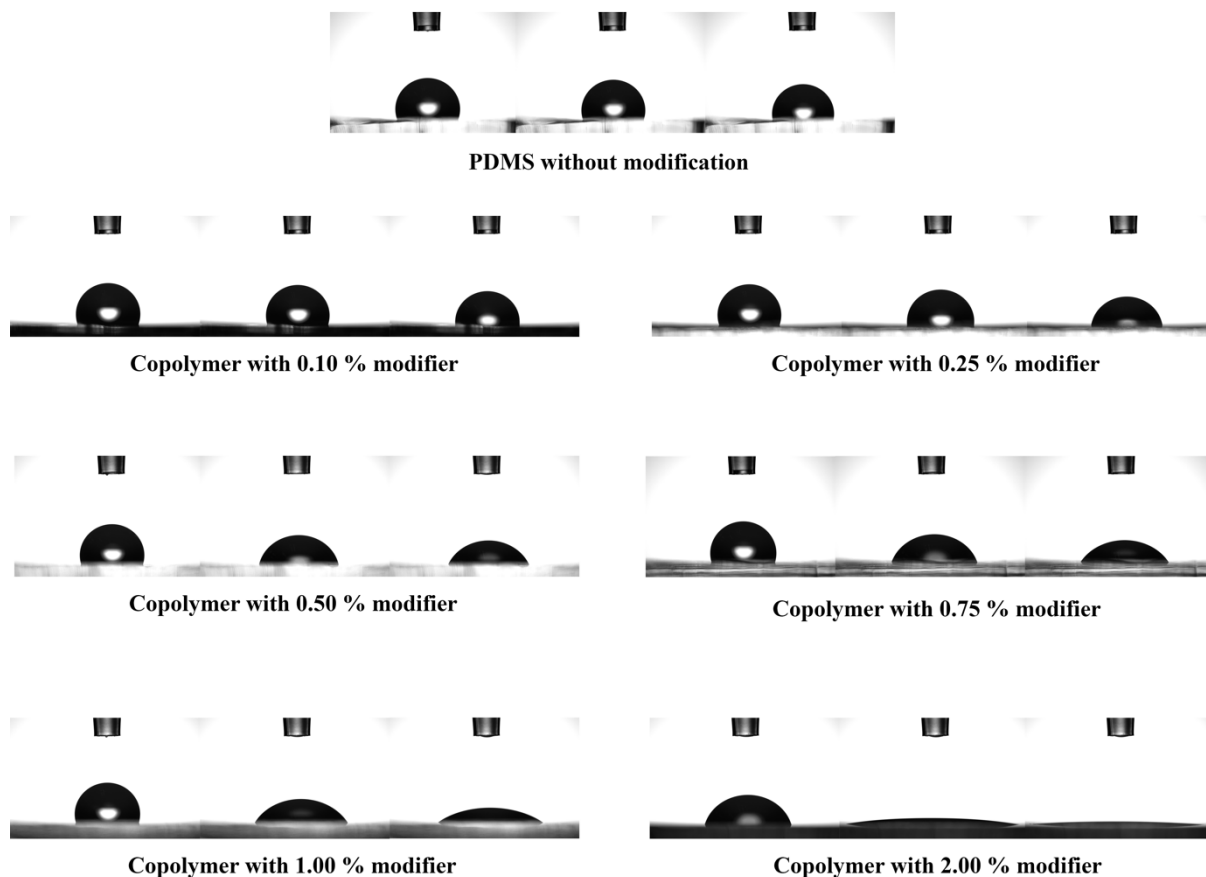

**Figure S2.** Droplet images taken after droplets reached the surface of copolymer with different concentrations of BCP modifier for 0 s, 180 s, and 600 s (from left to right, respectively) during monitoring of the contact angle.

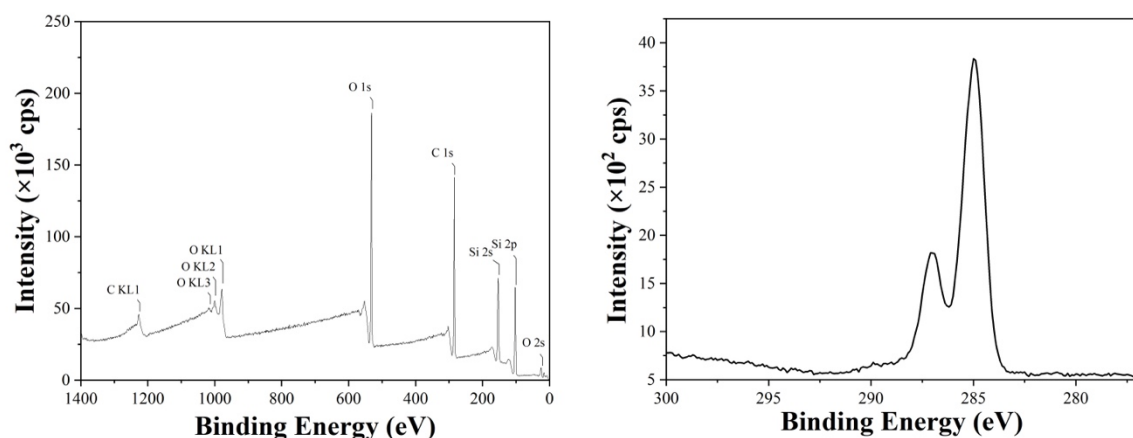

**Figure S3. a.** XPS spectrum of the patterned original PDMS after treated with plasma. **b.** The precise spectrum in the bonding energy range of C 1s of the patterned original PDMS slides after plasma treatment.

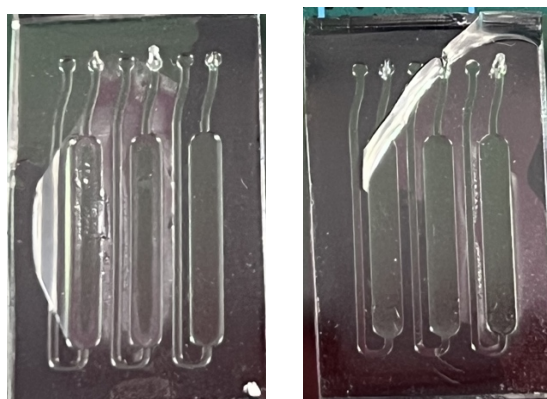

**Figure S4.** The chip failure caused by crushing the patterned slides.

**Table S2.** Comparison of the real-time PCR results from PPc-Si chips and conventional PDMS chips.

| No. | PPc-Si chips | Conventional PDMS chips |
|-----|--------------|-------------------------|
| 1   | 22.38        | 22.84                   |
| 2   | 22.39        | 22.89                   |
| 3   | 22.43        | 22.79                   |
| 4   | 22.43        | 22.62                   |
| 5   | 22.49        | 22.75                   |
| 6   | 22.49        | 22.76                   |
| 7   | 22.43        | 22.72                   |
| 8   | 22.52        | 22.87                   |
| 9   | 22.53        | 22.96                   |
